# Supplementary material
Source: PubMed Central journal article supplement (PMC9871117)
Supplement: 41747_2022_317_MOESM1_ESM.pdf [file 41747_2022_317_MOESM1_ESM.pdf]

## ELECTRONIC SUPPLEMENTARY MATERIALS

Artificial intelligence for differentiating COVID-19 from other viral pneumonias on CT:  
comparative analysis of different models based on quantitative and radiomic approaches

|                         | All Data COVID          |     |        |             | All Data non-COVID      |               |        |     |             |   |
|-------------------------|-------------------------|-----|--------|-------------|-------------------------|---------------|--------|-----|-------------|---|
|                         | Age (years)             |     | Sex    | n           | Age (years)             |               | Sex    | n   |             |   |
| Demographic Data        | 25th percentile         | 55  | M      | 458         | 25th percentile         | 54            | F      | 148 |             |   |
|                         | Median                  | 67  | F      | 189         | Median                  | 66            | M      | 236 |             |   |
|                         | 75th percentile         | 78  | F/M    | 41%         | 75th percentile         | 74            | F/M    | 63% |             |   |
|                         | IQR                     | 23  |        | 647         | IQR                     | 20            |        | 384 |             |   |
|                         |                         |     |        |             |                         |               |        |     |             |   |
|                         | Scanner model           |     | n      | Kernel      | n                       | Scanner model |        | n   | Kernel      | n |
| Siemens                 | Definition              | 273 | B30f   | 1           | Definition              | 133           | B30f   | 0   |             |   |
|                         | Sensation64             | 63  | B31f   | 3           | Sensation64             | 217           | B31f   | 0   |             |   |
|                         | DefinitionEdge          | 311 | BI57-1 | 287         | DefinitionEdge          | 5             | BI57-1 | 2   |             |   |
|                         |                         |     | BI57-3 | 24          |                         |               | BI57-3 | 3   |             |   |
|                         |                         |     | B70f   | 332         |                         |               | B70f   | 349 |             |   |
|                         | <b>Tot Siemens: 647</b> |     | B80f   | 0           | <b>Tot Siemens: 355</b> |               | B80f   | 1   |             |   |
| Philips                 | Brilliance64            | 0   | D      | 0           | Brilliance64            | 29            | D      | 1   |             |   |
|                         |                         |     | L      | 0           |                         |               | L      | 1   |             |   |
|                         |                         |     | YA     | 0           |                         |               | YA     | 0   |             |   |
|                         |                         |     | YB     | 0           |                         |               | YB     | 21  |             |   |
|                         |                         |     | YC     | 0           |                         |               | YC     | 6   |             |   |
|                         | <b>Tot Philips: 0</b>   |     |        |             | <b>Tot Philips: 29</b>  |               |        |     |             |   |
|                         |                         |     |        |             |                         |               |        |     |             |   |
| kVp and slice Thickness | kVp                     |     | n      | SI Thk (mm) | n                       | kVp           |        | n   | SI Thk (mm) | n |
|                         | 80                      | 1   | 1      | 44          | 80                      | 10            | 1      | 102 |             |   |
|                         | 100                     | 125 | 3      | 603         | 100                     | 93            | 3      | 279 |             |   |
|                         | 120                     | 446 | Other  | 0           | 120                     | 270           | Other  | 3   |             |   |
|                         | 140                     | 75  |        |             | 140                     | 11            |        |     |             |   |

**Table S1** Demographic data of patients, scanner models and acquisition parameters of all CT used in this work.

|                         | Training Set COVID |            |             |     | Training Set non-COVID |                    |             |           |    |
|-------------------------|--------------------|------------|-------------|-----|------------------------|--------------------|-------------|-----------|----|
|                         | Age (years)        |            | Sex         | n   | Age (years)            |                    | Sex         | n         |    |
| Demographic Data        | 25th percentile    | 55         | M           | 347 | 25th percentile        | 53.5               | M           | 188       |    |
|                         | Median             | 67         | F           | 149 | Median                 | 65                 | F           | 127       |    |
|                         | 75th percentile    | 78         | F/M         | 43% | 75th percentile        | 74                 | F/M         | 68%       |    |
|                         | IQR                | 23         | n:          | 496 | IQR                    | 20.5               | n:          | 315       |    |
|                         |                    |            |             |     |                        |                    |             |           |    |
|                         | model              |            | Kernel      | n   | model                  |                    | Kernel      | n         |    |
| Siemens                 | Definition         | 197        | B30f        | 1   | Definition             | 112                | B30f        | 0         |    |
|                         | Sensation64        | 44         | B31f        | 3   | Sensation64            | 174                | B31f        | 0         |    |
|                         | DefinitionEdge     | 255        | BI57-1      | 254 | DefinitionEdge         | 0                  | BI57-1      | 0         |    |
|                         |                    |            | BI57-3      | 1   |                        |                    | BI57-3      | 0         |    |
|                         |                    |            | B70f        | 237 |                        |                    | B70f        | 285       |    |
| <b>Tot Siemens</b>      |                    | <b>496</b> | B80f        | 0   | <b>Tot Siemens</b>     |                    | <b>286</b>  | B80f      | 1  |
| Philips                 | Brilliance64       | 0          | D           | 0   | Brilliance64           | 29                 | D           | 1         |    |
|                         |                    |            | L           | 0   |                        |                    | L           | 1         |    |
|                         |                    |            | YA          | 0   |                        |                    | YA          | 0         |    |
|                         |                    |            | YB          | 0   |                        |                    | YB          | 21        |    |
|                         | <b>Tot Philips</b> |            | <b>0</b>    | YC  | 0                      | <b>Tot Philips</b> |             | <b>29</b> | YC |
|                         |                    |            |             |     |                        |                    |             |           |    |
| kVp and slice Thickness | kVp                |            | SI Thk (mm) | n   | kVp                    |                    | SI Thk (mm) | n         |    |
|                         | 80                 | 0          | 1           | 17  | 80                     | 8                  | 1           | 89        |    |
|                         | 100                | 99         | 3           | 479 | 100                    | 82                 | 3           | 224       |    |
|                         | 120                | 340        | Other       | 0   | 120                    | 216                | Other       | 2         |    |
|                         | 140                | 57         |             |     | 140                    | 9                  |             |           |    |

**Table S2** Demographic data of patients, scanner models and acquisition parameters of CT used for the training set.

|                         | IVS COVID          |            |               |                    | IVS nonCOVID       |                    |               |                    |          |
|-------------------------|--------------------|------------|---------------|--------------------|--------------------|--------------------|---------------|--------------------|----------|
|                         | Age (years)        |            | Sex           | n                  | Age (years)        |                    | Sex           | n                  |          |
| Demographic Data        | 25th percentile    | 58         | M             | 111                | 25th percentile    | 60                 | M             | 48                 |          |
|                         | Median             | 67         | F             | 40                 | Median             | 68                 | F             | 21                 |          |
|                         | 75th percentile    | 79         | F/M           | 36%                | 75th percentile    | 75                 | F/M           | 44%                |          |
|                         | IQR                | 20         |               | 151                | IQR                | 15                 |               | 69                 |          |
|                         | <b>model</b>       |            | <b>Kernel</b> | <b>n</b>           | <b>model</b>       |                    | <b>Kernel</b> | <b>n</b>           |          |
| Siemens                 | Definition         | 76         | B30f          | 0                  | Definition         | 21                 | B30f          | 0                  |          |
|                         | Sensation64        | 19         | B31f          | 0                  | Sensation64        | 43                 | B31f          | 0                  |          |
|                         | DefinitionEdge     | 56         | BI57-1        | 33                 | DefinitionEdge     | 5                  | BI57-1        | 2                  |          |
|                         |                    |            | BI57-3        | 23                 |                    |                    | BI57-3        | 3                  |          |
|                         |                    |            | B70f          | 95                 |                    |                    | B70f          | 64                 |          |
| <b>Tot Siemens</b>      |                    | <b>151</b> | B80f          | 0                  | <b>Tot Siemens</b> |                    | <b>69</b>     | B80f               | 0        |
| Philips                 | Brilliance64       | 0          | D             | 0                  | Brilliance64       | 0                  | D             | 0                  |          |
|                         |                    |            | L             | 0                  |                    |                    | L             | 0                  |          |
|                         |                    |            | YA            | 0                  |                    |                    | YA            | 0                  |          |
|                         |                    |            | YB            | 0                  |                    |                    | YB            | 0                  |          |
|                         | <b>Tot Philips</b> |            | <b>0</b>      | YC                 | 0                  | <b>Tot Philips</b> |               | <b>0</b>           | YC       |
| kVp and slice Thickness | <b>kVp</b>         |            | <b>n</b>      | <b>SI Thk (mm)</b> | <b>n</b>           | <b>kVp</b>         |               | <b>SI Thk (mm)</b> | <b>n</b> |
|                         | 80                 | 1          | 1             | 27                 | 80                 | 2                  | 1             | 13                 |          |
|                         | 100                | 26         | 3             | 124                | 100                | 11                 | 3             | 55                 |          |
|                         | 120                | 106        | Other         | 0                  | 120                | 54                 | Other         | 1                  |          |
|                         | 140                | 18         |               |                    | 140                | 2                  |               |                    |          |

**Table S3** Demographic data of patients, scanner models and acquisition parameters of CT used for the independent validation set (IVS).

| Quantitative Metrics (QM)                                                                                                                                                                                                                                                                                                          | Number of QM |
|------------------------------------------------------------------------------------------------------------------------------------------------------------------------------------------------------------------------------------------------------------------------------------------------------------------------------------|--------------|
| Mean HU, p25 <sup>th</sup> , p50 <sup>th</sup> , p75 <sup>th</sup> , p90 <sup>th</sup> , Standard Deviation, Skewness, Kurtosis, mu.fit, sigma.fit, WAVE.fit, WAVE.th, Mean HU ill, Standard Deviation ill, p25 <sup>th</sup> ill, p50 <sup>th</sup> ill, p75 <sup>th</sup> ill, p90 <sup>th</sup> ill, Skewness ill, Kurtosis ill | 20           |

**Table S4** List and number of Quantitative Metrics extracted using gaussian model applied both on bilateral lungs and 4 geometrical subdivisions.

| Model   | Relevant features                                                                                                                                                                                                                                                                                                                                                                                                                                                                                                                                                                                                                                                                                              | Number of relevant features |
|---------|----------------------------------------------------------------------------------------------------------------------------------------------------------------------------------------------------------------------------------------------------------------------------------------------------------------------------------------------------------------------------------------------------------------------------------------------------------------------------------------------------------------------------------------------------------------------------------------------------------------------------------------------------------------------------------------------------------------|-----------------------------|
| Model 1 | Patient Age, Patient Sex, 10 percentile, Interquartile Range, Minimum, Range, Skewness, Total Energy, Uniformity, Variance                                                                                                                                                                                                                                                                                                                                                                                                                                                                                                                                                                                     | 10                          |
| Model 2 | Patient Age, Patient Sex, Skewness BL, p75 <sup>th</sup> BL, Standard Deviation ill BL, Skewness ill BL, Kurtosis LF, p75 <sup>th</sup> LF, Standard Deviation ill LF, p50 <sup>th</sup> ill LF, p75 <sup>th</sup> ill LF, p75 <sup>th</sup> UF, p90 <sup>th</sup> ill UF, skewness ill UF, Kurtosis LD, p90 <sup>th</sup> LD, Standard Deviation ill LD, skewness ill LD, Kurtosis ill LD, p50 <sup>th</sup> UD, Skewness UD, Kurtosis UD, p90 <sup>th</sup> UD, Standard Deviation ill UD, Upper/Lower, Front/Dorsal                                                                                                                                                                                         | 26                          |
| Model 3 | Patient Age, Patient Sex, 10 Percentile, Minimum, Range, Skewness, Variance, Difference Variance, Joint Entropy, Imc2 25, Inverse variance 25, Cluster Prominence 50, Cluster Shade 50, Gray Level Non Uniformity 25, Gray Level Non Uniformity Normalized 25, Low Gray Level Zone Emphasis 25, Zone Percentage 25, Large Area High Gray Level Emphasis 100, Size Zone Non Uniformity Normalized 100, Small Area Low Gray Level Emphasis 100, Zone Percentage 100, Large Area High Gray Level Emphasis 200, Small Area High Gray Level Emphasis 200, Zone Percentage 200                                                                                                                                       | 24                          |
| Model 4 | Patient Age, Patient Sex, Standard Deviation ill BL, Skewness ill BL, Kurtosis LF, p90 <sup>th</sup> UF, Standard Deviation ill LF, Kurtosis UF, p90 <sup>th</sup> ill UF, Skewness LD, p75 <sup>th</sup> ill LD, Skewness ill LD, Kurtosis ill LD, Skewness UD, Kurtosis ill UD, Front/Dorsal, Minimum, Joint Entropy, Maximum Probability 5, Cluster Shade 25, Imc2 25, Inverse Variance 25, Cluster Shade 50, Imc 2 50, Gray Level Non Uniformity 25, Gray Level Non Uniformity Normalized 25, Low Gray Level Zone Emphasis 25, Large Area High Gray Level Emphasis 100, Small Area Low Gray Level Emphasis 100, Size Zone Non-Uniformity 200, Small Area High Gray Level Emphasis 200, Zone Percentage 200 | 32                          |

**Table S5** Number and typology of relevant features both of first order (RF1) and second order (RF2: GLCM and GLSZM) for each model after LASSO regression. Legend: UF = Upper Front, UD = Upper Dorsal, LF = Lower Front, LD = Lower Dorsal.

The radiomic quality score (RQS) was calculated using the platform available at <https://www.radiomics.world/rqs> . In this work RQS=14 was calculated.
